# Supplementary material for: An integrative approach for measuring semantic similarities using gene ontology
Source: PubMed Central journal article supplement (PMC4305987; doi:10.1186/1752-0509-8-s5-s8), 2014-12-12
Supplement: 1752-0509-8-S5-S8-S4.pdf [file 1752-0509-8-S5-S8-S4.pdf]

# Supplementary Tables of “An Integrative Approach for Measuring Semantic Similarities using Gene Ontology”

Jiajie Peng, Hongxiang Li, Yadong Wang, Jin Chen

August 24, 2014

Table S1: The 25th percentile, median and 75th percentile value of LFC score boxplot on molecular function based on human EC for InteGO2, InteGO, average and 8 seed measures.

|          | 25th percentile | median | 75th percentile |
|----------|-----------------|--------|-----------------|
| InteGO2  | 4.489           | 5.929  | 6.943           |
| InteGO   | 2.638           | 3.888  | 4.986           |
| average  | 1.192           | 1.443  | 1.746           |
| fake     | -0.05           | -0.05  | -0.05           |
| HRSS     | 0.372           | 0.46   | 0.685           |
| Resnik   | 0.477           | 0.803  | 1.029           |
| Schliker | 0.764           | 1.015  | 1.498           |
| simGIC   | 0.56            | 0.825  | 1.461           |
| simUI    | 0.56            | 0.825  | 1.461           |
| TO       | 0.415           | 0.551  | 0.67            |
| Wang     | 0.998           | 1.675  | 2.396           |

Table S2: The 25th percentile, median and 75th percentile value of LFC score boxplot on molecular function based on arabidopsis EC for InteGO2, InteGO, average and 8 seed measures.

|          | 25th percentile | median | 75th percentile |
|----------|-----------------|--------|-----------------|
| InteGO2  | 3.051           | 4.63   | 7.861           |
| InteGO   | 1.668           | 3.119  | 7.819           |
| average  | 0.832           | 1.176  | 1.351           |
| fake     | -0.05           | -0.05  | -0.05           |
| HRSS     | 0.307           | 0.469  | 0.641           |
| Resnik   | 0.526           | 0.91   | 1.46            |
| Schliker | 0.838           | 1.346  | 2.037           |
| simGIC   | 0.86            | 1.45   | 2.625           |
| simUI    | 0.86            | 1.45   | 2.625           |
| TO       | 0.347           | 0.469  | 0.587           |
| Wang     | 1.509           | 2.093  | 3.677           |

Table S3: The 25th percentile, median and 75th percentile value of LFC score boxplot on molecular function based on yeast EC for InteGO2, InteGO, average and 8 seed measures.

|          | 25th percentile | median | 75th percentile |
|----------|-----------------|--------|-----------------|
| InteGO2  | 4.465           | 6.227  | 6.923           |
| InteGO   | 3.55            | 5.091  | 6.288           |
| average  | 2.878           | 3.503  | 4.121           |
| fake     | -0.05           | -0.05  | -0.05           |
| HRSS     | 0.424           | 0.659  | 0.908           |
| Resnik   | 0.603           | 0.734  | 0.974           |
| Schliker | 0.862           | 1.108  | 1.351           |
| simGIC   | 0.968           | 1.503  | 2.656           |
| simUI    | 0.968           | 1.503  | 2.656           |
| TO       | 0.633           | 0.831  | 1.394           |
| Wang     | 1.453           | 2.761  | 3.734           |

Table S4: The P-values for comparing InteGO2 with other measures using t-test on EC.

| Measures             | human     | arabidopsis | yeast     |
|----------------------|-----------|-------------|-----------|
| average vs. InteGO2  | < 1.0e-07 | < 1.0e-07   | < 1.0e-07 |
| InteGO vs. InteGO2   | < 1.0e-07 | < 1.0e-07   | < 1.0e-07 |
| fake vs. InteGO2     | < 1.0e-07 | < 1.0e-07   | < 1.0e-07 |
| HRSS vs. InteGO2     | < 1.0e-07 | < 1.0e-07   | < 1.0e-07 |
| Resnik vs. InteGO2   | < 1.0e-07 | < 1.0e-07   | < 1.0e-07 |
| Schliker vs. InteGO2 | < 1.0e-07 | < 1.0e-07   | < 1.0e-07 |
| simGIC vs. InteGO2   | < 1.0e-07 | 8.8e-01     | 4.6e-01   |
| simUI vs. InteGO2    | < 1.0e-07 | 8.8e-01     | 4.6e-01   |
| TO vs. InteGO2       | < 1.0e-07 | < 1.0e-07   | < 1.0e-07 |
| Wang vs. InteGO2     | < 1.0e-07 | 2.0e-01     | 8.0e-01   |

Table S5: The 25th percentile, median and 75th percentile value of LFC score boxplot on biological progress based on human pathway for InteGO2, InteGO, average and 8 seed measures.

|          | 25th percentile | median | 75th percentile |
|----------|-----------------|--------|-----------------|
| InteGO2  | 0.954           | 2.8    | 5.34            |
| InteGO   | 0.791           | 2.42   | 4.227           |
| average  | 0.537           | 0.927  | 1.473           |
| fake     | -0.05           | -0.05  | -0.05           |
| HRSS     | 0.267           | 0.461  | 0.734           |
| Resnik   | 0.271           | 0.477  | 0.733           |
| Schliker | 0.405           | 0.661  | 0.953           |
| simGIC   | 0.285           | 0.521  | 0.77            |
| simUI    | 0.285           | 0.521  | 0.77            |
| TO       | 0.163           | 0.296  | 0.508           |
| Wang     | 0.458           | 0.739  | 1.155           |

Table S6: The 25th percentile, median and 75th percentile value of LFC score boxplot on biological progress based on arabidopsis pathway for InteGO2, InteGO, average and 8 seed measures.

|          | 25th percentile | median | 75th percentile |
|----------|-----------------|--------|-----------------|
| InteGO2  | 0.15            | 0.866  | 2.895           |
| InteGO   | 0.286           | 0.597  | 1.548           |
| average  | 0.199           | 0.417  | 0.788           |
| fake     | -0.05           | -0.05  | -0.05           |
| HRSS     | 0.221           | 0.388  | 0.671           |
| Resnik   | 0.231           | 0.447  | 0.642           |
| Schliker | 0.296           | 0.529  | 0.746           |
| simGIC   | 0.285           | 0.479  | 0.692           |
| simUI    | 0.285           | 0.479  | 0.692           |
| TO       | 0.219           | 0.338  | 0.688           |
| Wang     | 0.333           | 0.563  | 0.937           |

Table S7: The 25th percentile, median and 75th percentile value of LFC score boxplot on biological progress based on yeast pathway for InteGO2, InteGO, average and 8 seed measures.

|          | 25th percentile | median | 75th percentile |
|----------|-----------------|--------|-----------------|
| InteGO2  | 2.316           | 3.852  | 5.066           |
| InteGO   | 0.59            | 1.967  | 3.24            |
| average  | 1.435           | 2.156  | 3.533           |
| fake     | -0.05           | -0.05  | -0.05           |
| HRSS     | 0.347           | 0.493  | 0.784           |
| Resnik   | 0.481           | 0.739  | 1.047           |
| Schliker | 0.663           | 0.993  | 1.386           |
| simGIC   | 0.515           | 0.843  | 1.378           |
| simUI    | 0.515           | 0.843  | 1.378           |
| TO       | 0.324           | 0.534  | 0.862           |
| Wang     | 0.751           | 1.153  | 1.872           |

Table S8: The P-values for comparing InteGO2 with other measures using t-test on pathway.

| Measures             | human     | arabidopsis | yeast     |
|----------------------|-----------|-------------|-----------|
| InteGO vs. InteGO2   | < 1.0e-07 | 8.1e-02     | < 1.0e-07 |
| average vs. InteGO2  | < 1.0e-07 | < 1.0e-07   | < 1.0e-07 |
| fake vs. InteGO2     | < 1.0e-07 | < 1.0e-07   | < 1.0e-07 |
| HRSS vs. InteGO2     | < 1.0e-07 | < 1.0e-07   | < 1.0e-07 |
| Resnik vs. InteGO2   | < 1.0e-07 | < 1.0e-07   | < 1.0e-07 |
| Schliker vs. InteGO2 | < 1.0e-07 | < 1.0e-07   | < 1.0e-07 |
| simGIC vs. InteGO2   | < 1.0e-07 | 8.3e-01     | < 1.0e-07 |
| simUI vs. InteGO2    | < 1.0e-07 | 8.3e-01     | < 1.0e-07 |
| TO vs. InteGO2       | < 1.0e-07 | < 1.0e-07   | < 1.0e-07 |
| Wang vs. InteGO2     | < 1.0e-07 | 9.8e-01     | < 1.0e-07 |

Table S9: The 25th percentile, median and 75th percentile value of LFC score boxplot on molecular function based on human EC. InteGO2(n) means the best n input measures of InteGO2 are removed.

|             | 25th percentile | median | 75th percentile |
|-------------|-----------------|--------|-----------------|
| InteGO2 (0) | 4.489           | 5.929  | 6.943           |
| InteGO2 (1) | 4.467           | 5.76   | 6.903           |
| InteGO2 (2) | 4.405           | 5.799  | 6.901           |
| InteGO2 (3) | 3.017           | 4.907  | 6.011           |
| InteGO2 (4) | 1.671           | 4.43   | 5.917           |

Table S10: The R-squared score with polynomial model to show the correlation between semantic similarity and sequence similarity on human.

|       | InteGO2 | InteGO | HRSS | Resnik | Schlicker | simGIC | simUI | TO   | Wang |
|-------|---------|--------|------|--------|-----------|--------|-------|------|------|
| human | 0.96    | 0.89   | 0.56 | 0.84   | 0.83      | 0.73   | 0.85  | 0.92 | 0.95 |
